# Supplementary material for: Winemaking Technologies for the Production of Cabernet Sauvignon and Feteasca Neagra Wines Enriched with Antioxidant Active Principles Due to the Addition of Melatonin
Source: MDPI journal article supplement (doi:10.3390/foods13060884), 2024-03-14
Supplement: s1 [file s1]

**Table S1. The phenolic acids, flavanols, flavonols and stilbenes values obtained by the HPLC-MS method from red wines**

| Compound         | $\mu\text{g mL}^{-1}$      |                         |                         |                         |                         |                          |                          |                          |                        |                         |                         |                         |                         |                          |                          |                          |
|------------------|----------------------------|-------------------------|-------------------------|-------------------------|-------------------------|--------------------------|--------------------------|--------------------------|------------------------|-------------------------|-------------------------|-------------------------|-------------------------|--------------------------|--------------------------|--------------------------|
|                  | <b>FNI</b><br><b>M</b>     | <b>FNI</b><br><b>V1</b> | <b>FNI</b><br><b>V2</b> | <b>FNI</b><br><b>V3</b> | <b>FNII</b><br><b>M</b> | <b>FNII</b><br><b>V1</b> | <b>FNII</b><br><b>V2</b> | <b>FNII</b><br><b>V3</b> | <b>CSI</b><br><b>M</b> | <b>CSI</b><br><b>V1</b> | <b>CSI</b><br><b>V2</b> | <b>CSI</b><br><b>V3</b> | <b>CSII</b><br><b>M</b> | <b>CSII</b><br><b>V1</b> | <b>CSII</b><br><b>V2</b> | <b>CSII</b><br><b>V3</b> |
| Gallic acid      | 3 months (december 2022)   |                         |                         |                         |                         |                          |                          |                          |                        |                         |                         |                         |                         |                          |                          |                          |
|                  | 16.32                      | 13.72                   | 14.27                   | 15.62                   | 20.76                   | 17.81                    | 14.76                    | 14.48                    | 13.60                  | 9.91                    | 9.76                    | 11.80                   | 12.14                   | 9.13                     | 9.49                     | 7.94                     |
|                  | 6 months (march2023)       |                         |                         |                         |                         |                          |                          |                          |                        |                         |                         |                         |                         |                          |                          |                          |
|                  | 150.68                     | 130.98                  | 129.07                  | 130.09                  | 153.17                  | 137.43                   | 132.84                   | 123.37                   | 119.78                 | 88.17                   | 74.12                   | 77.10                   | 70.29                   | 44.38                    | 50.00                    | 61.09                    |
|                  | 9 months (june 2023)       |                         |                         |                         |                         |                          |                          |                          |                        |                         |                         |                         |                         |                          |                          |                          |
|                  | 192.16                     | 187.24                  | 187.46                  | 164.72                  | 187.63                  | 164.37                   | 141.16                   | 151.89                   | 159.67                 | 123.47                  | 110.04                  | 148.79                  | 117.19                  | 84.19                    | 71.61                    | 64.57                    |
| Caffeic acid     | 12 months (september 2023) |                         |                         |                         |                         |                          |                          |                          |                        |                         |                         |                         |                         |                          |                          |                          |
|                  | 252.50                     | 204.59                  | 205.68                  | 176.46                  | 186.61                  | 149.90                   | 119.31                   | 96.05                    | 393.47                 | 186.47                  | 215.20                  | 194.93                  | 373.90                  | 227.91                   | 213.28                   | 169.76                   |
|                  | 3 months (december 2022)   |                         |                         |                         |                         |                          |                          |                          |                        |                         |                         |                         |                         |                          |                          |                          |
|                  | 9.79                       | 9.02                    | 8.83                    | 10.98                   | 11.22                   | 14.02                    | 12.47                    | 12.26                    | 3.79                   | 3.71                    | 3.59                    | 3.36                    | 4.63                    | 4.73                     | 4.59                     | 3.59                     |
|                  | 6 months (march2023)       |                         |                         |                         |                         |                          |                          |                          |                        |                         |                         |                         |                         |                          |                          |                          |
|                  | 5.29                       | 4.98                    | 4.63                    | 5.45                    | 5.19                    | 6.00                     | 6.37                     | 5.34                     | 1.89                   | 1.97                    | 1.59                    | 1.36                    | 1.62                    | 1.75                     | 1.57                     | 1.02                     |
| Chlorogenic acid | 9 months (june 2023)       |                         |                         |                         |                         |                          |                          |                          |                        |                         |                         |                         |                         |                          |                          |                          |
|                  | 11.25                      | 13.37                   | 12.62                   | 16.04                   | 15.30                   | 19.28                    | 16.33                    | 16.48                    | 7.06                   | 6.36                    | 5.35                    | 6.58                    | 5.37                    | 5.53                     | 4.19                     | 3.32                     |
|                  | 12 months (september 2023) |                         |                         |                         |                         |                          |                          |                          |                        |                         |                         |                         |                         |                          |                          |                          |
|                  | 5.33                       | 6.44                    | 5.16                    | 6.65                    | 3.79                    | 3.30                     | 3.03                     | 1.84                     | 3.87                   | 4.67                    | 5.38                    | 7.17                    | 1.61                    | 6.15                     | 5.11                     | 3.41                     |
|                  | 3 months (december 2022)   |                         |                         |                         |                         |                          |                          |                          |                        |                         |                         |                         |                         |                          |                          |                          |
|                  | 6.25                       | 6.52                    | 6.84                    | 7.75                    | 7.21                    | 8.28                     | 6.89                     | 6.46                     | 10.75                  | 12.93                   | 11.26                   | 12.07                   | 11.11                   | 11.27                    | 11.12                    | 9.82                     |
| Myricetin        | 6 months (march2023)       |                         |                         |                         |                         |                          |                          |                          |                        |                         |                         |                         |                         |                          |                          |                          |
|                  | 5.48                       | 5.85                    | 5.72                    | 6.42                    | 3.80                    | 4.08                     | 4.23                     | 5.38                     | 7.70                   | 9.37                    | 8.21                    | 7.52                    | 6.73                    | 6.93                     | 6.50                     | 6.58                     |
|                  | 9 months (june 2023)       |                         |                         |                         |                         |                          |                          |                          |                        |                         |                         |                         |                         |                          |                          |                          |
|                  | 3.60                       | 4.40                    | 3.88                    | 4.66                    | 4.84                    | 5.29                     | 4.71                     | 5.61                     | 5.68                   | 5.30                    | 5.10                    | 4.92                    | 3.73                    | 4.30                     | 3.89                     | 2.95                     |
|                  | 12 months (september 2023) |                         |                         |                         |                         |                          |                          |                          |                        |                         |                         |                         |                         |                          |                          |                          |
|                  | 3.91                       | 3.63                    | 4.48                    | 4.61                    | 3.52                    | 3.06                     | 2.90                     | 2.33                     | 5.53                   | 6.71                    | 5.74                    | 10.27                   | 8.30                    | 10.31                    | 8.32                     | 5.46                     |
| Quercetin        | 3 months (december 2022)   |                         |                         |                         |                         |                          |                          |                          |                        |                         |                         |                         |                         |                          |                          |                          |
|                  | 25.47                      | 22.68                   | 24.80                   | 32.26                   | 31.24                   | 22.66                    | 18.39                    | 28.76                    | 21.71                  | 22.30                   | 23.80                   | 21.91                   | 26.75                   | 30.20                    | 28.53                    | 21.67                    |
|                  | 6 months (march2023)       |                         |                         |                         |                         |                          |                          |                          |                        |                         |                         |                         |                         |                          |                          |                          |
|                  | 22.07                      | 19.85                   | 18.73                   | 22.62                   | 20.19                   | 15.41                    | 16.28                    | 18.81                    | 13.76                  | 14.69                   | 14.94                   | 11.53                   | 13.48                   | 13.71                    | 12.26                    | 10.72                    |
|                  | 9 months (june 2023)       |                         |                         |                         |                         |                          |                          |                          |                        |                         |                         |                         |                         |                          |                          |                          |
|                  | 28.69                      | 30.74                   | 29.28                   | 41.38                   | 43.33                   | 33.17                    | 30.80                    | 43.19                    | 26.81                  | 28.10                   | 27.34                   | 22.94                   | 25.98                   | 29.62                    | 24.29                    | 18.82                    |
| Quercetin        | 12 months (september 2023) |                         |                         |                         |                         |                          |                          |                          |                        |                         |                         |                         |                         |                          |                          |                          |
|                  | 19.73                      | 21.55                   | 16.93                   | 24.57                   | 13.82                   | 7.39                     | 7.76                     | 6.70                     | 9.68                   | 10.83                   | 18.58                   | 24.84                   | 24.70                   | 30.74                    | 21.39                    | 14.41                    |
| Quercetin        | 3 months (december 2022)   |                         |                         |                         |                         |                          |                          |                          |                        |                         |                         |                         |                         |                          |                          |                          |
|                  | 16.59                      | 17.72                   | 19.17                   | 23.07                   | 24.49                   | 17.66                    | 13.62                    | 20.20                    | 27.06                  | 26.09                   | 27.09                   | 23.78                   | 28.91                   | 30.41                    | 29.10                    | 25.92                    |

|                                   |                            |       |       |       |       |       |       |       |        |        |       |       |       |       |       |       |
|-----------------------------------|----------------------------|-------|-------|-------|-------|-------|-------|-------|--------|--------|-------|-------|-------|-------|-------|-------|
|                                   | 6 months (march2023)       |       |       |       |       |       |       |       |        |        |       |       |       |       |       |       |
|                                   | 17.37                      | 15.21 | 14.50 | 20.98 | 19.70 | 12.05 | 13.08 | 12.11 | 23.19  | 22.00  | 22.46 | 17.39 | 18.08 | 18.55 | 17.54 | 15.40 |
|                                   | 9 months (june 2023)       |       |       |       |       |       |       |       |        |        |       |       |       |       |       |       |
|                                   | 13.10                      | 13.52 | 10.97 | 23.59 | 28.25 | 16.34 | 16.59 | 15.37 | 30.08  | 28.86  | 27.90 | 20.41 | 23.42 | 27.52 | 22.36 | 18.74 |
| Quercitrin                        | 12 months (september 2023) |       |       |       |       |       |       |       |        |        |       |       |       |       |       |       |
|                                   | 9.26                       | 8.13  | 5.24  | 9.39  | 7.25  | 3.37  | 3.62  | 2.26  | 15.14  | 15.21  | 22.99 | 31.07 | 26.58 | 32.58 | 24.05 | 19.26 |
|                                   | 3 months (december 2022)   |       |       |       |       |       |       |       |        |        |       |       |       |       |       |       |
|                                   | 0.14                       | 0.14  | 0.16  | 0.16  | 0.16  | 0.12  | 0.15  | 0.15  | 4.48   | 3.88   | 2.78  | 2.24  | 2.09  | 3.03  | 2.03  | 2.44  |
|                                   | 6 months (march2023)       |       |       |       |       |       |       |       |        |        |       |       |       |       |       |       |
|                                   | 0.33                       | 0.34  | 0.35  | 0.34  | 0.34  | 0.30  | 0.32  | 0.32  | 4.15   | 3.61   | 2.84  | 1.86  | 1.82  | 2.47  | 1.64  | 1.93  |
| Quercetin 3- $\beta$ -D-glucoside | 9 months (june 2023)       |       |       |       |       |       |       |       |        |        |       |       |       |       |       |       |
|                                   | 0.94                       | 0.99  | 0.97  | 1.10  | 0.92  | 0.95  | 0.88  | 0.86  | 7.74   | 7.06   | 5.23  | 3.49  | 3.37  | 3.76  | 2.94  | 3.57  |
|                                   | 12 months (september 2023) |       |       |       |       |       |       |       |        |        |       |       |       |       |       |       |
|                                   | 0.53                       | 0.76  | 0.65  | 0.93  | 0.47  | 0.33  | 0.37  | 0.33  | 3.05   | 2.84   | 2.73  | 2.13  | 1.90  | 2.73  | 2.09  | 2.25  |
|                                   | 3 months (december 2022)   |       |       |       |       |       |       |       |        |        |       |       |       |       |       |       |
|                                   | 3.78                       | 4.00  | 4.05  | 5.14  | 5.46  | 2.93  | 3.07  | 3.07  | 46.27  | 42.43  | 39.18 | 34.18 | 35.67 | 37.64 | 33.48 | 38.96 |
| Rutin                             | 6 months (march2023)       |       |       |       |       |       |       |       |        |        |       |       |       |       |       |       |
|                                   | 3.37                       | 3.80  | 3.61  | 4.09  | 4.01  | 2.15  | 2.33  | 2.59  | 20.33  | 15.74  | 14.33 | 11.09 | 10.86 | 16.27 | 10.90 | 10.31 |
|                                   | 9 months (june 2023)       |       |       |       |       |       |       |       |        |        |       |       |       |       |       |       |
|                                   | 5.13                       | 8.03  | 7.61  | 9.25  | 8.39  | 5.39  | 4.66  | 5.64  | 109.39 | 100.17 | 90.76 | 73.40 | 71.49 | 73.72 | 59.99 | 66.49 |
|                                   | 12 months (september 2023) |       |       |       |       |       |       |       |        |        |       |       |       |       |       |       |
|                                   | 1.48                       | 1.62  | 1.35  | 1.60  | 1.07  | 0.56  | 0.51  | 0.43  | 26.55  | 27.20  | 25.37 | 22.81 | 23.69 | 29.65 | 21.36 | 21.90 |
| (-)-Catechin                      | 3 months (december 2022)   |       |       |       |       |       |       |       |        |        |       |       |       |       |       |       |
|                                   | 1.30                       | 1.16  | 1.10  | 1.36  | 1.49  | 1.07  | 1.08  | 1.27  | 4.74   | 4.88   | 3.66  | 2.59  | 2.86  | 3.26  | 2.81  | 3.05  |
|                                   | 6 months (march2023)       |       |       |       |       |       |       |       |        |        |       |       |       |       |       |       |
|                                   | 0.62                       | 0.62  | 0.62  | 0.80  | 0.85  | 0.70  | 0.73  | 0.73  | 2.76   | 2.71   | 2.12  | 1.22  | 1.29  | 1.59  | 1.22  | 1.48  |
|                                   | 9 months (june 2023)       |       |       |       |       |       |       |       |        |        |       |       |       |       |       |       |
|                                   | 1.60                       | 1.96  | 2.03  | 2.48  | 2.90  | 2.21  | 2.08  | 2.40  | 4.72   | 4.94   | 4.53  | 3.61  | 3.86  | 4.38  | 3.48  | 3.27  |
| (-)-Catechin                      | 12 months (september 2023) |       |       |       |       |       |       |       |        |        |       |       |       |       |       |       |
|                                   | 0.10                       | 0.12  | 0.08  | 0.15  | 0.11  | 0.09  | 0.11  | 0.06  | -      | -      | -     | -     | -     | -     | -     | -     |
|                                   | 3 months (december 2022)   |       |       |       |       |       |       |       |        |        |       |       |       |       |       |       |
|                                   | 15.37                      | 14.16 | 14.08 | 12.14 | 9.41  | 12.81 | 15.27 | 16.47 | 6.52   | 10.54  | 15.25 | 16.42 | 12.84 | 16.38 | 15.37 | 14.74 |
|                                   | 6 months (march2023)       |       |       |       |       |       |       |       |        |        |       |       |       |       |       |       |
|                                   | 10.91                      | 10.03 | 8.59  | 8.25  | 5.26  | 7.30  | 7.18  | 8.42  | 3.02   | 6.15   | 8.93  | 7.72  | 4.35  | 5.62  | 6.57  | 4.28  |
| (-)-Catechin                      | 9 months (june 2023)       |       |       |       |       |       |       |       |        |        |       |       |       |       |       |       |
|                                   | 12.48                      | 20.04 | 19.09 | 17.23 | 12.53 | 15.66 | 15.77 | 21.76 | 11.64  | 16.02  | 21.77 | 21.80 | 15.76 | 19.11 | 18.67 | 16.52 |
|                                   | 12 months (september 2023) |       |       |       |       |       |       |       |        |        |       |       |       |       |       |       |
|                                   | 5.62                       | 8.58  | 8.97  | 7.84  | 5.98  | 6.00  | 6.17  | 5.42  | 1.78   | 3.09   | 8.99  | 16.77 | 13.20 | 11.83 | 11.62 | 8.69  |

|                     |                            |       |       |       |       |       |       |       |        |        |        |        |        |        |        |       |
|---------------------|----------------------------|-------|-------|-------|-------|-------|-------|-------|--------|--------|--------|--------|--------|--------|--------|-------|
| (+) -Catechin       | 3 months (december 2022)   |       |       |       |       |       |       |       |        |        |        |        |        |        |        |       |
|                     | 31.18                      | 25.30 | 26.48 | 31.92 | 33.54 | 39.18 | 32.59 | 32.29 | 62.01  | 75.69  | 60.25  | 63.34  | 54.91  | 56.92  | 56.80  | 43.88 |
|                     | 6 months (march2023)       |       |       |       |       |       |       |       |        |        |        |        |        |        |        |       |
|                     | 34.02                      | 25.72 | 24.97 | 30.04 | 29.89 | 35.08 | 32.78 | 27.80 | 46.75  | 50.37  | 44.61  | 42.49  | 30.96  | 37.05  | 33.23  | 24.83 |
|                     | 9 months (june 2023)       |       |       |       |       |       |       |       |        |        |        |        |        |        |        |       |
|                     | 58.90                      | 60.54 | 63.20 | 73.78 | 73.12 | 86.66 | 77.87 | 81.82 | 126.79 | 123.35 | 112.95 | 117.62 | 85.77  | 97.99  | 84.36  | 56.26 |
| (-)-<br>Epicatechin | 12 months (september 2023) |       |       |       |       |       |       |       |        |        |        |        |        |        |        |       |
|                     | 43.60                      | 57.38 | 44.81 | 60.81 | 32.72 | 29.14 | 26.22 | 20.16 | 75.14  | 94.25  | 135.48 | 177.89 | 127.49 | 162.28 | 128.34 | 77.38 |
|                     | 3 months (december 2022)   |       |       |       |       |       |       |       |        |        |        |        |        |        |        |       |
|                     | 40.27                      | 32.65 | 33.30 | 43.14 | 28.05 | 44.00 | 36.09 | 37.64 | 39.95  | 47.80  | 44.61  | 52.19  | 43.23  | 45.44  | 40.56  | 29.39 |
|                     | 6 months (march2023)       |       |       |       |       |       |       |       |        |        |        |        |        |        |        |       |
|                     | 31.16                      | 24.73 | 23.66 | 30.37 | 19.03 | 30.36 | 26.76 | 23.34 | 27.99  | 33.08  | 32.13  | 32.58  | 19.42  | 24.18  | 23.03  | 12.35 |
| Resveratrol         | 9 months (june 2023)       |       |       |       |       |       |       |       |        |        |        |        |        |        |        |       |
|                     | 50.32                      | 56.62 | 53.62 | 69.28 | 46.22 | 78.53 | 59.14 | 64.70 | 69.08  | 77.52  | 75.57  | 84.36  | 51.46  | 63.59  | 55.82  | 35.17 |
|                     | 12 months (september 2023) |       |       |       |       |       |       |       |        |        |        |        |        |        |        |       |
|                     | 18.05                      | 20.69 | 15.30 | 23.66 | 9.78  | 12.44 | 11.24 | 8.44  | 15.73  | 19.40  | 30.30  | 22.90  | 28.46  | 42.82  | 31.40  | 17.35 |
|                     | 3 months (december 2022)   |       |       |       |       |       |       |       |        |        |        |        |        |        |        |       |
|                     | 12.85                      | 12.61 | 14.98 | 19.28 | 9.57  | 7.28  | 12.06 | 14.03 | 11.07  | 8.07   | 19.28  | 21.22  | 9.29   | 13.20  | 7.91   | 11.82 |
| Ellagic acid        | 6 months (march2023)       |       |       |       |       |       |       |       |        |        |        |        |        |        |        |       |
|                     | 9.33                       | 9.12  | 9.73  | 11.5  | 5.54  | 3.45  | 14.87 | 19.85 | 11.53  | 13.29  | 23.07  | 26.11  | 10.52  | 15.73  | 11.20  | 11.86 |
|                     | 9 months (june 2023)       |       |       |       |       |       |       |       |        |        |        |        |        |        |        |       |
|                     | 7.58                       | 9.15  | 7.33  | 10.33 | 9.94  | 7.30  | 15.33 | 12.46 | 11.20  | 13.20  | 14.23  | 11.77  | 13.68  | 19.13  | 12.37  | 12.13 |
|                     | 12 months (september 2023) |       |       |       |       |       |       |       |        |        |        |        |        |        |        |       |
|                     | 7.98                       | 10.70 | 8.61  | 14.81 | 13.08 | 9.80  | 11.83 | 11.29 | 11.83  | 12.93  | 12.90  | 12.34  | 13.90  | 21.40  | 9.41   | 10.19 |
| Ellagic acid        | 3 months (december 2022)   |       |       |       |       |       |       |       |        |        |        |        |        |        |        |       |
|                     | 14.40                      | 13.13 | 14.22 | 16.38 | 14.07 | 13.17 | 11.35 | 15.40 | 10.97  | 9.10   | 9.11   | 9.14   | 8.53   | 9.33   | 7.78   | 8.31  |
|                     | 6 months (march2023)       |       |       |       |       |       |       |       |        |        |        |        |        |        |        |       |
|                     | 16.12                      | 13.88 | 14.01 | 16.63 | 12.64 | 12.79 | 12.49 | 14.80 | 6.41   | 5.90   | 5.44   | 4.19   | 3.74   | 4.06   | 2.98   | 3.68  |
|                     | 9 months (june 2023)       |       |       |       |       |       |       |       |        |        |        |        |        |        |        |       |
|                     | 34.85                      | 37.76 | 38.55 | 46.41 | 41.83 | 42.68 | 35.97 | 53.82 | 29.78  | 24.68  | 23.07  | 22.06  | 19.00  | 20.45  | 14.93  | 14.45 |
| Ellagic acid        | 12 months (september 2023) |       |       |       |       |       |       |       |        |        |        |        |        |        |        |       |
|                     | 23.16                      | 24.38 | 22.16 | 26.09 | 13.58 | 9.44  | 9.78  | 8.84  | 8.84   | 9.13   | 13.61  | 19.06  | 16.05  | 20.15  | 12.48  | 4.69  |

| The anthocyanidins and anthocyanins values obtained by the HPLC-MS method from red wines |                            |           |           |           |           |            |            |            |          |           |           |           |           |            |            |            |
|------------------------------------------------------------------------------------------|----------------------------|-----------|-----------|-----------|-----------|------------|------------|------------|----------|-----------|-----------|-----------|-----------|------------|------------|------------|
| $\mu\text{g mL}^{-1}$                                                                    |                            |           |           |           |           |            |            |            |          |           |           |           |           |            |            |            |
| Compunds                                                                                 | FNI<br>M                   | FNI<br>V1 | FNI<br>V2 | FNI<br>V3 | FNII<br>M | FNII<br>V1 | FNII<br>V2 | FNII<br>V3 | CSI<br>M | CSI<br>V1 | CSI<br>V2 | CSI<br>V3 | CSII<br>M | CSII<br>V1 | CSII<br>V2 | CSII<br>V3 |
| Delphinidin                                                                              | 3 months (december 2022)   |           |           |           |           |            |            |            |          |           |           |           |           |            |            |            |
|                                                                                          | 1.27                       | 1.28      | 1.29      | 1.30      | 1.26      | 1.27       | 1.26       | 1.27       | 1.31     | 1.32      | 1.28      | 1.27      | 1.30      | 1.34       | 1.31       | 1.33       |
|                                                                                          | 6 months (march2023)       |           |           |           |           |            |            |            |          |           |           |           |           |            |            |            |
|                                                                                          | 2.59                       | 2.53      | 2.46      | 2.58      | 2.29      | 1.79       | 1.92       | 2.05       | 2.23     | 2.40      | 2.19      | 1.75      | 1.61      | 1.81       | 1.71       | 1.71       |
|                                                                                          | 9 months (june 2023)       |           |           |           |           |            |            |            |          |           |           |           |           |            |            |            |
|                                                                                          | 2.13                       | 2.18      | 2.17      | 2.23      | 2.09      | 1.24       | 1.83       | 1.81       | 2.99     | 2.98      | 2.28      | 2.44      | 2.69      | 3.83       | 3.00       | 3.73       |
| Delphinidin-3-glucoside                                                                  | 12 months (september 2023) |           |           |           |           |            |            |            |          |           |           |           |           |            |            |            |
|                                                                                          | 1.04                       | 1.18      | 1.44      | 1.71      | 1.79      | 1.18       | 1.15       | 1.24       | 5.44     | 5.28      | 3.99      | 2.78      | 2.26      | 2.68       | 2.23       | 2.51       |
|                                                                                          | 3 months (december 2022)   |           |           |           |           |            |            |            |          |           |           |           |           |            |            |            |
|                                                                                          | 564.31                     | 534.26    | 558.05    | 688.37    | 561.53    | 456.51     | 459.10     | 635.21     | 787.14   | 921.56    | 823.60    | 628.11    | 804.27    | 950.80     | 877.57     | 832.50     |
|                                                                                          | 6 months (march2023)       |           |           |           |           |            |            |            |          |           |           |           |           |            |            |            |
|                                                                                          | 610.25                     | 596.23    | 612.44    | 747.76    | 560.71    | 366.72     | 496.00     | 572.78     | 362.48   | 396.86    | 378.37    | 255.32    | 271.56    | 319.08     | 271.66     | 221.65     |
| Peonidin-3-glucoside                                                                     | 9 months (june 2023)       |           |           |           |           |            |            |            |          |           |           |           |           |            |            |            |
|                                                                                          | 282.78                     | 261.25    | 244.87    | 289.96    | 265.47    | 138.53     | 200.35     | 206.87     | 205.69   | 248.11    | 179.08    | 125.73    | 265.05    | 380.24     | 331.31     | 303.83     |
|                                                                                          | 12 months (september 2023) |           |           |           |           |            |            |            |          |           |           |           |           |            |            |            |
|                                                                                          | 65.14                      | 71.66     | 79.83     | 118.14    | 125.12    | 90.48      | 98.14      | 102.06     | 81.38    | 112.47    | 97.38     | 70.19     | 79.54     | 95.38      | 84.93      | 81.88      |
|                                                                                          | 3 months (december 2022)   |           |           |           |           |            |            |            |          |           |           |           |           |            |            |            |
|                                                                                          | 25.23                      | 24.66     | 27.24     | 31.24     | 25.41     | 27.05      | 23.30      | 22.28      | 22.09    | 26.03     | 24.70     | 20.72     | 25.41     | 29.10      | 26.50      | 26.88      |
| Cyanidin-3-glucoside                                                                     | 6 months (march2023)       |           |           |           |           |            |            |            |          |           |           |           |           |            |            |            |
|                                                                                          | 20.80                      | 20.15     | 20.29     | 26.04     | 18.40     | 22.45      | 19.07      | 21.79      | 12.89    | 8.34      | 14.64     | 10.35     | 11.01     | 12.50      | 11.57      | 10.05      |
|                                                                                          | 9 months (june 2023)       |           |           |           |           |            |            |            |          |           |           |           |           |            |            |            |
|                                                                                          | 9.93                       | 9.30      | 8.77      | 10.41     | 8.93      | 6.03       | 8.30       | 7.39       | 3.91     | 6.36      | 3.89      | 2.80      | 6.51      | 9.94       | 8.98       | 7.71       |
|                                                                                          | 12 months (september 2023) |           |           |           |           |            |            |            |          |           |           |           |           |            |            |            |
|                                                                                          | 5.46                       | 6.27      | 7.96      | 11.80     | 12.32     | 1.15       | 11.54      | 10.63      | 6.14     | 9.93      | 8.92      | 7.19      | 7.39      | 9.21       | 7.90       | 8.05       |
| Malvidin                                                                                 | 3 months (december 2022)   |           |           |           |           |            |            |            |          |           |           |           |           |            |            |            |
|                                                                                          | 1.80                       | 2.07      | 2.42      | 3.19      | 2.32      | 2.18       | 1.85       | 2.70       | 4.32     | 6.39      | 5.78      | 3.82      | 5.21      | 7.30       | 6.25       | 6.03       |
|                                                                                          | 6 months (march2023)       |           |           |           |           |            |            |            |          |           |           |           |           |            |            |            |
|                                                                                          | 2.93                       | 3.06      | 3.28      | 4.24      | 2.88      | 2.49       | 2.68       | 3.76       | 2.77     | 4.27      | 3.84      | 2.30      | 2.51      | 3.38       | 2.71       | 2.77       |
|                                                                                          | 9 months (june 2023)       |           |           |           |           |            |            |            |          |           |           |           |           |            |            |            |
|                                                                                          | 0.91                       | 0.84      | 0.75      | 1.04      | 0.84      | 0.54       | 0.66       | 0.70       | 1.00     | 1.49      | 1.08      | 0.72      | 1.60      | 2.73       | 2.22       | 2.15       |
| Malvidin                                                                                 | 12 luni (septembrie 2023)  |           |           |           |           |            |            |            |          |           |           |           |           |            |            |            |
|                                                                                          | 0.97                       | 1.18      | 1.57      | 2.08      | 2.06      | 1.78       | 1.78       | 1.94       | 1.58     | 2.46      | 2.07      | 1.32      | 1.44      | 2.14       | 1.81       | 1.91       |
| Malvidin                                                                                 | 3 months (december 2022)   |           |           |           |           |            |            |            |          |           |           |           |           |            |            |            |
|                                                                                          | 4.27                       | 4.13      | 4.28      | 4.38      | 3.93      | 3.38       | 3.10       | 3.53       | 17.19    | 18.97     | 19.72     | 19.76     | 23.93     | 22.71      | 20.13      | 18.92      |

|                       |                            |        |        |        |        |        |        |        |        |        |        |        |        |        |        |        |
|-----------------------|----------------------------|--------|--------|--------|--------|--------|--------|--------|--------|--------|--------|--------|--------|--------|--------|--------|
|                       | 6 months (march2023)       |        |        |        |        |        |        |        |        |        |        |        |        |        |        |        |
|                       | 2.85                       | 2.92   | 2.67   | 3.04   | 2.77   | 2.04   | 2.30   | 2.61   | 4.77   | 6.86   | 6.16   | 5.70   | 4.96   | 9.89   | 10.07  | 6.07   |
|                       | 9 months (june 2023)       |        |        |        |        |        |        |        |        |        |        |        |        |        |        |        |
|                       | 1.63                       | 1.71   | 1.65   | 1.85   | 1.67   | 0.95   | 1.42   | 1.40   | 4.29   | 5.08   | 4.00   | 3.50   | 6.29   | 7.72   | 7.05   | 6.03   |
| Malvidin-3-glucoside  | 12 months (september 2023) |        |        |        |        |        |        |        |        |        |        |        |        |        |        |        |
|                       | 2.24                       | 1.94   | 1.86   | 2.80   | 2.39   | 1.85   | 2.07   | 1.88   | 5.04   | 6.66   | 6.21   | 5.91   | 5.88   | 5.54   | 4.88   | 4.03   |
|                       | 3 months (december 2022)   |        |        |        |        |        |        |        |        |        |        |        |        |        |        |        |
|                       | 708.74                     | 656.63 | 680.08 | 708.34 | 704.28 | 585.03 | 571.34 | 644.04 | 539.50 | 566.18 | 569.14 | 565.22 | 668.01 | 688.32 | 632.10 | 598.86 |
|                       | 6 months (march2023)       |        |        |        |        |        |        |        |        |        |        |        |        |        |        |        |
|                       | 677.73                     | 633.92 | 620.96 | 683.06 | 581.64 | 520.02 | 518.03 | 594.92 | 279.53 | 286.25 | 298.71 | 252.31 | 241.92 | 240.13 | 228.98 | 169.92 |
| Petunidin-3-glucoside | 9 months (june 2023)       |        |        |        |        |        |        |        |        |        |        |        |        |        |        |        |
|                       | 357.36                     | 374.58 | 353.70 | 407.61 | 371.60 | 199.06 | 306.44 | 306.81 | 166.71 | 214.19 | 157.23 | 139.34 | 246.61 | 288.05 | 264.10 | 229.34 |
|                       | 12 months (september 2023) |        |        |        |        |        |        |        |        |        |        |        |        |        |        |        |
|                       | 153.50                     | 163.51 | 181.95 | 224.48 | 264.63 | 193.84 | 211.61 | 213.58 | 112.79 | 154.73 | 150.03 | 144.05 | 147.20 | 157.49 | 142.38 | 132.96 |
|                       | 3 months (december 2022)   |        |        |        |        |        |        |        |        |        |        |        |        |        |        |        |
|                       | 92.75                      | 87.00  | 91.11  | 104.66 | 92.46  | 78.86  | 78.16  | 92.82  | 93.84  | 101.07 | 91.60  | 79.19  | 93.91  | 106.97 | 98.08  | 97.23  |
|                       | 6 months (march2023)       |        |        |        |        |        |        |        |        |        |        |        |        |        |        |        |
|                       | 79.92                      | 77.86  | 78.04  | 94.34  | 73.93  | 63.93  | 68.14  | 75.85  | 34.72  | 35.33  | 34.13  | 25.70  | 25.81  | 28.37  | 25.05  | 22.97  |
|                       | 9 months (june 2023)       |        |        |        |        |        |        |        |        |        |        |        |        |        |        |        |
|                       | 39.09                      | 38.16  | 35.67  | 43.34  | 38.97  | 20.57  | 30.30  | 30.21  | 19.53  | 23.05  | 16.00  | 11.82  | 22.46  | 29.96  | 26.35  | 25.58  |
|                       | 12 months (september 2023) |        |        |        |        |        |        |        |        |        |        |        |        |        |        |        |
|                       | 36.23                      | 37.38  | 44.72  | 63.72  | 71.73  | 52.13  | 56.35  | 56.03  | 31.49  | 42.66  | 17.17  | 29.17  | 30.36  | 36.71  | 32.12  | 33.18  |

FN- Feteasca Neagra, CS- Cabernet Sauvignon, I-punch down, II-pumping over, M-control samples, V1- 50, V2-100, V3-500 µg of melatonin were applied to 1 kg of must.
